# Supplementary material for: Introducing Sustainability in Value Models to Support Design Decision Making: A Systematic Review
Source: Preprints.org preprint supplement (doi:10.20944/preprints201705.0003.v1), 2017-05-01
Supplement: Supplementary file 1 [file supplementary]

## Sheet: Total hits
	Literature review statistics
	Database	Scopus				Keywords	Value*	Sustainab*	Innovat*	System*
	Type	"Article"	"Review"	"Book chapter"					Design*	Technolog*
	Fields	"Article title"	"Abstract"	"Keyword"					Develop*	Offer*
	Export	CSV file with citations and abstract information							Engineer*	Product*
	Period	Restricted to period 2006-2016								Service*
					2017-01-27
	Complete search query				14881			TITLE-ABS-KEY(Value* AND Sustainab* AND (engineer* OR innovat* OR design* OR develop*) AND (system* OR technolog* OR offer* OR product* OR service*)) AND PUBYEAR > 2006 AND ( LIMIT-TO(DOCTYPE,"ar" ) OR LIMIT-TO(DOCTYPE,"re" ) OR LIMIT-TO(DOCTYPE,"ch" ) )
	Value*	Sustainab*	Innovat*		2763			TITLE-ABS-KEY ( value* AND sustainab* AND innovat* ) AND PUBYEAR > 2006 AND ( LIMIT-TO ( DOCTYPE , "ar" ) OR LIMIT-TO ( DOCTYPE , "re" ) OR LIMIT-TO ( DOCTYPE , "ch" ) )
	Value*	Sustainab*	Innovat*	System*	1093			TITLE-ABS-KEY ( value* AND sustainab* AND innovat* AND system* ) AND PUBYEAR > 2006 AND ( LIMIT-TO ( DOCTYPE , "ar" ) OR LIMIT-TO ( DOCTYPE , "re" ) OR LIMIT-TO ( DOCTYPE , "ch" ) )
	Value*	Sustainab*	Innovat*	Technolog*	897			TITLE-ABS-KEY(Value* AND Sustainab* AND Innovat* AND technol*) AND PUBYEAR > 2006 AND ( LIMIT-TO(DOCTYPE,"ar" ) OR LIMIT-TO(DOCTYPE,"re" ) OR LIMIT-TO(DOCTYPE,"ch" ) )
	Value*	Sustainab*	Innovat*	Offer*	411			TITLE-ABS-KEY(Value* AND Sustainab* AND Innovat* AND offer*) AND PUBYEAR > 2006 AND ( LIMIT-TO(DOCTYPE,"ar" ) OR LIMIT-TO(DOCTYPE,"re" ) OR LIMIT-TO(DOCTYPE,"ch" ) )
	Value*	Sustainab*	Innovat*	Product*	1044			TITLE-ABS-KEY(Value* AND Sustainab* AND Innovat* AND product*) AND PUBYEAR > 2006 AND ( LIMIT-TO(DOCTYPE,"ar" ) OR LIMIT-TO(DOCTYPE,"re" ) OR LIMIT-TO(DOCTYPE,"ch" ) )
	Value*	Sustainab*	Innovat*	Service*	573			TITLE-ABS-KEY ( value* AND sustainab* AND innovat* AND service* ) AND PUBYEAR > 2006 AND ( LIMIT-TO ( DOCTYPE , "ar" ) OR LIMIT-TO ( DOCTYPE , "re" ) OR LIMIT-TO ( DOCTYPE , "ch" ) )
	Value*	Sustainab*	Design*		8313			TITLE-ABS-KEY ( value* AND sustainab* AND design* ) AND PUBYEAR > 2006 AND ( LIMIT-TO ( DOCTYPE , "ar" ) OR LIMIT-TO ( DOCTYPE , "re" ) OR LIMIT-TO ( DOCTYPE , "ch" ) )
	Value*	Sustainab*	Design*	System*	3006			TITLE-ABS-KEY ( value* AND sustainab* AND design* AND system* ) AND PUBYEAR > 2006 AND ( LIMIT-TO ( DOCTYPE , "ar" ) OR LIMIT-TO ( DOCTYPE , "re" ) OR LIMIT-TO ( DOCTYPE , "ch" ) )
	Value*	Sustainab*	Design*	Technolog*	1315			TITLE-ABS-KEY(Value* AND Sustainab* AND design* AND technolog*) AND PUBYEAR > 2006 AND ( LIMIT-TO(DOCTYPE,"ar" ) OR LIMIT-TO(DOCTYPE,"re" ) OR LIMIT-TO(DOCTYPE,"ch" ) )
	Value*	Sustainab*	Design*	Offer*	1026			TITLE-ABS-KEY ( value* AND sustainab* AND design* AND offer* ) AND PUBYEAR > 2006 AND ( LIMIT-TO ( DOCTYPE , "ar" ) OR LIMIT-TO ( DOCTYPE , "re" ) OR LIMIT-TO ( DOCTYPE , "ch" ) )
	Value*	Sustainab*	Design*	Product*	2336			TITLE-ABS-KEY(Value* AND Sustainab* AND design* AND product*) AND PUBYEAR > 2006 AND ( LIMIT-TO(DOCTYPE,"ar" ) OR LIMIT-TO(DOCTYPE,"re" ) OR LIMIT-TO(DOCTYPE,"ch" ) )
	Value*	Sustainab*	Design*	Service*	1377			TITLE-ABS-KEY(Value* AND Sustainab* AND design* AND service*) AND PUBYEAR > 2006 AND ( LIMIT-TO(DOCTYPE,"ar" ) OR LIMIT-TO(DOCTYPE,"re" ) OR LIMIT-TO(DOCTYPE,"ch" ) )
	Value*	Sustainab*	Develop*		17882			TITLE-ABS-KEY ( value* AND sustainab* AND develop* ) AND PUBYEAR > 2006 AND ( LIMIT-TO ( DOCTYPE , "ar" ) OR LIMIT-TO ( DOCTYPE , "re" ) OR LIMIT-TO ( DOCTYPE , "ch" ) )
	Value*	Sustainab*	Develop*	System*	6655			TITLE-ABS-KEY(Value* AND Sustainab* AND develop* AND system*) AND PUBYEAR > 2006 AND ( LIMIT-TO(DOCTYPE,"ar" ) OR LIMIT-TO(DOCTYPE,"re" ) OR LIMIT-TO(DOCTYPE,"ch" ) )
	Value*	Sustainab*	Develop*	Technolog*	2957			TITLE-ABS-KEY(Value* AND Sustainab* AND develop* AND technolog*) AND PUBYEAR > 2006 AND ( LIMIT-TO(DOCTYPE,"ar" ) OR LIMIT-TO(DOCTYPE,"re" ) OR LIMIT-TO(DOCTYPE,"ch" ) )
	Value*	Sustainab*	Develop*	Offer*	1610			TITLE-ABS-KEY(Value* AND Sustainab* AND develop* AND offer*) AND PUBYEAR > 2006 AND ( LIMIT-TO(DOCTYPE,"ar" ) OR LIMIT-TO(DOCTYPE,"re" ) OR LIMIT-TO(DOCTYPE,"ch" ) )
	Value*	Sustainab*	Develop*	Product*	5922			TITLE-ABS-KEY ( value* AND sustainab* AND develop* AND product* ) AND PUBYEAR > 2006 AND ( LIMIT-TO ( DOCTYPE , "ar" ) OR LIMIT-TO ( DOCTYPE , "re" ) OR LIMIT-TO ( DOCTYPE , "ch" ) )
	Value*	Sustainab*	Develop*	Service*	2613			TITLE-ABS-KEY ( value* AND sustainab* AND develop* AND service* ) AND PUBYEAR > 2006 AND ( LIMIT-TO ( DOCTYPE , "ar" ) OR LIMIT-TO ( DOCTYPE , "re" ) OR LIMIT-TO ( DOCTYPE , "ch" ) )
	Value*	Sustainab*	Engineer*		1729			TITLE-ABS-KEY ( value* AND sustainab* AND engineer* ) AND PUBYEAR > 2006 AND ( LIMIT-TO ( DOCTYPE , "ar" ) OR LIMIT-TO ( DOCTYPE , "re" ) OR LIMIT-TO ( DOCTYPE , "ch" ) )
	Value*	Sustainab*	Engineer*	System*	757			TITLE-ABS-KEY ( value* AND sustainab* AND engineer* AND system* ) AND PUBYEAR > 2006 AND ( LIMIT-TO ( DOCTYPE , "ar" ) OR LIMIT-TO ( DOCTYPE , "re" ) OR LIMIT-TO ( DOCTYPE , "ch" ) )
	Value*	Sustainab*	Engineer*	Technolog*	494			TITLE-ABS-KEY(Value* AND Sustainab* AND engineer* AND technolog*) AND PUBYEAR > 2006 AND ( LIMIT-TO(DOCTYPE,"ar" ) OR LIMIT-TO(DOCTYPE,"re" ) OR LIMIT-TO(DOCTYPE,"ch" ) )
	Value*	Sustainab*	Engineer*	Offer*	136			TITLE-ABS-KEY(Value* AND Sustainab* AND engineer* AND offer*) AND PUBYEAR > 2006 AND ( LIMIT-TO(DOCTYPE,"ar" ) OR LIMIT-TO(DOCTYPE,"re" ) OR LIMIT-TO(DOCTYPE,"ch" ) )
	Value*	Sustainab*	Engineer*	Product*	785			TITLE-ABS-KEY(Value* AND Sustainab* AND engineer* AND product*) AND PUBYEAR > 2006 AND ( LIMIT-TO(DOCTYPE,"ar" ) OR LIMIT-TO(DOCTYPE,"re" ) OR LIMIT-TO(DOCTYPE,"ch" ) )
	Value*	Sustainab*	Engineer*	Service*	220			TITLE-ABS-KEY ( value* AND sustainab* AND engineer* AND service* ) AND PUBYEAR > 2006 AND ( LIMIT-TO ( DOCTYPE , "ar" ) OR LIMIT-TO ( DOCTYPE , "re" ) OR LIMIT-TO ( DOCTYPE , "ch" ) )
	Systematic literature review
	Abstract selected				193
	Impact ratio				0.0129696

## Sheet: SOTA full paper filtered
	List of full text filtered papers							2017
					Re			2017-01-30
	Journal name	Year	Level	Topic	Type of contribution	Entiity studied	Industrial sector	Citations (Google Scholar)	Citations per year	Full reference
	Supply Chain Management	2012	Tactical	Supply chain challen.	Review/Themes	Company	Generic/Undefined	101	20.2	Abbasi, M., & Nilsson, F. (2012). Themes and challenges in making supply chains environmentally sustainable. Supply Chain Management: An International Journal, 17(5), 517-530.
	Organization and Environment	2015	Strategic	BM selection	Model/Function	Company	Generic/Undefined	14	7	Abdelkafi, N., & Täuscher, K. (2015). Business Models for Sustainability From a System Dynamics Perspective. Organization & Environment, 1086026615592930.
	International Journal of Project Management	2007	Tactical	Project KPI	Methodology	Projects	Building and transportation	50	5	Abidin, N. Z., & Pasquire, C. L. (2007). Revolutionize value management: A mode towards sustainability. International Journal of Project Management, 25(3), 275-282.
	Kybernetes	2016	Strategic	Sustainability score	Indicator	Company	Commodities and consumer products	0	0	Afful-Dadzie, A., Afful-Dadzie, E., & Turkson, C. (2016). A TOPSIS extension framework for re-conceptualizing sustainability measurement. Kybernetes, 45(1), 70-86.
	Journal of Cleaner Production	2013	Tactical	Manufacturing KPI	Model/Function	Products	Automotive and machineries	63	15.75	Aguado, S., Alvarez, R., & Domingo, R. (2013). Model of efficient and sustainable improvements in a lean production system through processes of environmental innovation. Journal of Cleaner Production, 47, 141-148.
	Engineering, Construction and Architectural Management	2012	Operational	DM Drivers	Indicator	Materials	Building and transportation	37	7.4	Akadiri, P. O., & Olomolaiye, P. O. (2012). Development of sustainable assessment criteria for building materials selection. Engineering, Construction and Architectural Management, 19(6), 666-687.
	Sustainability	2011	Operational	Functions value/utility	Model/Function	Materials	Building and transportation	41	6.83333	Alarcon, B., Aguado, A., Manga, R., & Josa, A. (2010). A value function for assessing sustainability: application to industrial buildings. Sustainability, 3(1), 35-50.
	International Journal of Operations and Production Management	2014	Strategic	Areas of Interventions	Review/Themes	Company	Automotive and machineries	28	9.33333	Alblas, A. A., Peters, K., & Wortmann, J. C. (2014). Fuzzy sustainability incentives in new product development: An empirical exploration of sustainability challenges in manufacturing companies. International Journal of Operations & Production Management, 34(4), 513-545.
	Service Science Research, Strategy and Innovation: Dynamic Knowledge Management Methods	2012	Strategic	Business transformation	Review/Themes	Services and PSS	Generic/Undefined	1	0.2	Antonova, A. (2012). Service Science, Value Creation, and Sustainable Development: Understanding Service-Based Business. Regional Development: Concepts, Methodologies, Tools, and Applications: Concepts, Methodologies, Tools, and Applications, 108.
	Journal of Construction Engineering and Management	2015	Operational	Qualitative models	Model/Function	Materials	Building and transportation	3	1.5	Arroyo, P., Tommelein, I. D., & Ballard, G. (2015). Selecting Globally Sustainable Materials: A Case Study Using Choosing by Advantages. Journal of Construction Engineering and Management, 05015015.
	International Journal of Sustainable Engineering	2013	Metalevel	Sust. Framework	Model/Function	Products	Automotive and machineries	6	1.5	Aschehoug, S. H., & Boks, C. (2013). Towards a framework for sustainability information in product development. International Journal of Sustainable Engineering, 6(2), 94-108.
	Supply Chain Management	2012	Tactical	Supply chain challen.	Review/Themes	Company	Generic/Undefined	261	52.2	Ashby, A., Leat, M., & Hudson-Smith, M. (2012). Making connections: a review of supply chain management and sustainability literature. Supply Chain Management: An International Journal, 17(5), 497-516.
	International Journal of Sustainable Manufacturing	2011	Operational	Simulation/Optimization	Model/Function	Services and PSS	Generic/Undefined	9	1.5	Badurdeen, F., & Liyanage, J. P. (2011). Sustainable value co-creation through mass customisation: a framework. International Journal of Sustainable Manufacturing, 2(2-3), 180-203.
	Treatise on Sustainability Science and Engineering	2013	Operational	DM Drivers	Indicator	Products	Generic/Undefined	3	0.75	Badurdeen, F., Goldsby, T. J., Iyengar, D., & Jawahir, I. S. (2013). Transforming supply chains to create sustainable value for all stakeholders. In Treatise on Sustainability Science and Engineering (pp. 311-338). Springer Netherlands.
	HandBook of Manufacturing Engineering and Technology	2015	Operational	DM Drivers	Model/Function	Products	Automotive and machineries	0	0	Badurdeen, F., Shuaib, M. A., Lu, T., & Jawahir, I. S. (2015). Sustainable Value Creation in Manufacturing at Product and Process Levels: Metrics-Based Evaluation. In Handbook of Manufacturing Engineering and Technology (pp. 3343-3375). Springer London.
	Supply Chain Management	2012	Tactical	Supply chain KPI	Model/Function	Company	Generic/Undefined	102	20.4	Bai, C., Sarkis, J., Wei, X., & Koh, L. (2012). Evaluating ecological sustainable performance measures for supply chain management. Supply Chain Management: An International Journal, 17(1), 78-92.
	International Journal of Sustainable Engineering	2015	Operational	Qualitative models	Matrix	Materials	Building and transportation	1	0.5	Bakhoum, E. S., & Brown, D. C. (2015). An automated decision support system for sustainable selection of structural materials. International Journal of Sustainable Engineering, 8(2), 80-92.
	Archives of Materials Science and Engineering	2013	Tactical	Manufacturing KPI	ISO Standard	Products	Generic/Undefined	0	0	Batalha, G. F., Roszak, M. T., da Silva, I. B., Agostinho, O. L., & Dobrzański, L. A. (2013). Towards a design for ecological management and product sustainability–European and Brazilian approaches. Materials Science and Engineering, 64(1), 34-39.
	Industrial Engineer	2011	Tactical	Supply chain KPI	Model/Function	Products	Automotive and machineries	5	0.833333	Bayat, A., Sundararajan, S., Gustafson Jr, H. R., & Zimmers Jr, E. W. (2011). Sustainably driven supply chains. Industrial Engineer, 43(8), 26-31.
	Business Strategy and the Environment	2014	Strategic	Areas of Interventions	Framework/Roadmap	Company	Generic/Undefined	48	16	Beckmann, M., Hielscher, S., & Pies, I. (2014). Commitment Strategies for Sustainability: How Business Firms Can Transform Trade‐Offs Into Win–Win Outcomes. Business Strategy and the Environment, 23(1), 18-37.
	Sustainability: Multi-Disciplinary Perspectives	2012	Strategic	Value creation areas	Review/Themes	Company	Generic/Undefined	1	0.2	Beloff, B., & Chevallier, A. (2012). The Case and Practice for Sustainability in Business. In H. Cabezas, U. Diwekar (eds) Sustainability:Multi-Disciplinary Perspectives, pp. 310-339 (30)
	Decision Support Systems	2015	Operational	Simulation/Optimization	Model/Function	Products	Automotive and machineries	5	2.5	Bhattacharjee, S., & Cruz, J. (2015). Economic sustainability of closed loop supply chains: A holistic model for decision and policy analysis. Decision Support Systems, 77, 67-86.
	Journal of Business and Industrial Marketing	2014	Strategic	Areas of Interventions	Review/Themes	Products	Commodities and consumer products	10	3.33333	Biggemann, S., Williams, M., & Kro, G. (2014). Building in sustainability, social responsibility and value co-creation. Journal of Business & Industrial Marketing, 29(4), 304-312.
	CIRP Annals - Manufacturing Technology	2016	Tactical	Manufacturing KPI	Model/Function	Products	Automotive and machineries	0	0	Bilge, P., Badurdeen, F., Seliger, G., & Jawahir, I. S. (2016). A novel manufacturing architecture for sustainable value creation. CIRP Annals-Manufacturing Technology, 65(1), 455-458.
	Journal of Cleaner Production	2015	Metalevel	Customer perception	Survey/Experiment	Products	Commodities and consumer products	14	7	Biswas, A., & Roy, M. (2015). Leveraging factors for sustained green consumption behavior based on consumption value perceptions: testing the structural model. Journal of Cleaner Production, 95, 332-340.
	Journal of Industrial and Production Engineering	2015	Strategic	Business transformation	Framework/Roadmap	Products	Commodities and consumer products	31	15.5	Bocken, N. M. P., Rana, P., & Short, S. W. (2015). Vkumaring. Journal of Industrial and Production Engineering, 32(1), 67-81.
	Journal of Cleaner Production	2014	Strategic	Business transformation	Framework/Roadmap	Services and PSS	Generic/Undefined	324	108	Bocken, N. M. P., Short, S. W., Rana, P., & Evans, S. (2014). A literature and practice review to develop sustainable business model archetypes. Journal of Cleaner Production, 65, 42-56.
	Journal of Cleaner Production	2014	Metalevel	Sust. Framework	Survey/Experiment	Products	Commodities and consumer products	39	13	Bolis, I., Morioka, S. N., & Sznelwar, L. I. (2014). When sustainable development risks losing its meaning. Delimiting the concept with a comprehensive literature review and a conceptual model. Journal of Cleaner Production, 83, 7-20.
	Journal of Cleaner Production	2013	Strategic	Business transformation	Review/Themes	Company	Generic/Undefined	420	105	Boons, F., & Lüdeke-Freund, F. (2013). Business models for sustainable innovation: state-of-the-art and steps towards a research agenda. Journal of Cleaner Production, 45, 9-19.
	Journal of Manufacturing Technology Management	2015	Tactical	Supply chain KPI	Model/Function	Products	Automotive and machineries	5	2.5	Boonsothonsatit, K., Kara, S., Ibbotson, S., & Kayis, B. (2015). Development of a Generic decision support system based on multi-Objective Optimisation for Green supply chain network design (GOOG). Journal of Manufacturing Technology Management, 26(7), 1069-1084.
	Management of Environmental Quality	2007	Operational	DM Drivers	Model/Function	Processes and assets	Generic/Undefined	21	2.1	Brent, A. C., & Labuschagne, C. (2007). An appraisal of social aspects in project and technology life cycle management in the process industry. Management of Environmental Quality: An International Journal, 18(4), 413-426.
	Benchmarking	2016	Tactical	Supply chain KPI	Survey/Experiment	Products	Generic/Undefined	0	0	Brockhaus, S., Fawcett, S., Kersten, W., & Knemeyer, M. (2016). A framework for benchmarking product sustainability efforts: Using systems dynamics to achieve supply chain alignment. Benchmarking: An International Journal, 23(1), 127-164.
	Journal of Cleaner Production	2017	Metalevel	Sust. Framework	Framework/Roadmap	Products	Generic/Undefined	33	33	Broman, G. I., & Robèrt, K. H. (2017). A framework for strategic sustainable development. Journal of Cleaner Production, 140, 17-31.
	Journal of Cleaner Production	2014	Tactical	Manufacturing KPI	Review/Themes	Company	Automotive and machineries	33	11	Brown, A., Amundson, J., & Badurdeen, F. (2014). Sustainable value stream mapping (Sus-VSM) in different manufacturing system configurations: application case studies. Journal of Cleaner Production, 85, 164-179.
	Business Strategy and the Environment	2009	Strategic	Business transformation	Review/Themes	Projects	Building and transportation	65	8.125	Bryson, J. R., & Lombardi, R. (2009). Balancing product and process sustainability against business profitability: Sustainability as a competitive strategy in the property development process. Business Strategy and the Environment, 18(2), 97-107.
	Business Horizons	2015	Strategic	BM selection	Model/Function	Products	Commodities and consumer products	10	5	Buxel, H., Esenduran, G., & Griffin, S. (2015). Strategic sustainability: Creating business value with life cycle analysis. Business Horizons, 58(1), 109-122.
	International Journal of Physical Distribution and Logistics Management	2011	Tactical	Supply chain challen.	Review/Themes	Company	Automotive and machineries	578	96.3333	Carter, C. R., & Liane Easton, P. (2011). Sustainable supply chain management: evolution and future directions. International journal of physical distribution & logistics management, 41(1), 46-62.
	International Journal of Sustainable Engineering	2011	Tactical	Project KPI	Model/Function	Products	Automotive and machineries	3	0.5	Catarino, J., Henriques, J. J., Maia, A., Alexandre, J., Rodrigues, F., & Camocho, D. (2011). From cleaner production and value management to sustainable value. International Journal of Sustainable Engineering, 4(02), 96-108.
	SpringerBriefs in Applied Sciences and Technology	2013	Strategic	Business transformation	Review/Themes	Services and PSS	Generic/Undefined	5	1.25	Ceschin, F. (2014). Product-service system innovation: a promising approach to sustainability. In Sustainable Product-Service Systems (pp. 17-40). Springer International Publishing.
	Management of Environmental Quality	2012	Tactical	Supply chain KPI	ISO Standard	Company	Generic/Undefined	33	6.6	Chiarini, A. (2012). Designing an environmental sustainable supply chain through ISO 14001 standard. Management of Environmental Quality: An International Journal, 24(1), 16-33.
	International Journal of Industrial Engineering : Theory Applications and Practice	2015	Strategic	BM selection	Methodology	Services and PSS	Generic/Undefined	0	0	Chiu, M. C., Kuo, M. Y., & Kuo, T. C. (2015).A systematic methodology to develop business model of a product service system. International Journal of Industrial Engineering, 22(3).
	Journal of Cleaner Production	2015	Strategic	BM selection	Indicator	Services and PSS	Generic/Undefined	26	13	Chou, C. J., Chen, C. W., & Conley, C. (2015). An approach to assessing sustainable product-service systems. Journal of Cleaner Production, 86, 277-284.
	Research Technology Management	2015	Strategic	Value creation areas	Indicator	Services and PSS	Commodities and consumer products	2	1	Chou, C. J., Chen, C. W., & Conley, C. (2015). Creating Sustainable Value Through Service Offerings. Research-Technology Management, 58(2), 48-55.
	TQM Journal	2013	Strategic	Areas of Interventions	Review/Themes	Company	Commodities and consumer products	26	6.5	Ciasullo,V. M., & Troisi, O. (2013). Sustainable value creation in SMEs: A case study. The TQM Journal, 25(1), 44-61.
	International Journal of Computer Integrated Manufacturing	2015	Strategic	BM selection	Model/Function	Products	Automotive and machineries	7	3.5	Copani, G., & Rosa, P. (2015). DEMAT: sustainability assessment of new flexibility-oriented business models in the machine tools industry. International Journal of Computer Integrated Manufacturing, 28(4), 408-417.
	Journal of Cleaner Production	2016	Operational	Functions value/utility	Model/Function	Products	Commodities and consumer products	10	10	Coskun, S., Ozgur, L., Polat, O., & Gungor, A. (2016). A model proposal for green supply chain network design based on consumer segmentation. Journal of Cleaner Production, 110, 149-157.
	Civil Engineering and Environmental Systems	2016	Operational	Functions value/utility	Model/Function	Projects	Building and transportation	3	3	Cuadrado, J., Zubizarreta, M., Rojí, E., Larrauri, M., & Álvarez, I. (2016). Sustainability assessment methodology for industrial buildings: three case studies. Civil engineering and environmental systems, 33(2), 106-124.
	Ecological indicators	2012	Strategic	KPI measurement	Review/Themes	Company	Generic/Undefined	164	32.8	Dahl, A. L. (2012). Achievements and gaps in indicators for sustainability. Ecological Indicators, 17, 14-19.
	Journal of Cleaner Production	2017	Metalevel	Customer perception	Survey/Experiment	Products	Commodities and consumer products	2	2	de Medeiros, J. F., & Ribeiro, J. L. D. (2017). Environmentally sustainable innovation: Expected attributes in the purchase of green products. Journal of Cleaner Production, 142, 240-248.
	Ecological Economics	2009	Metalevel	Sust. Framework	Survey/Experiment	Products	Commodities and consumer products	134	16.75	De Vries, B. J., & Petersen, A. C. (2009). Conceptualizing sustainable development: An assessment methodology connecting values, knowledge, worldviews and scenarios. Ecological Economics, 68(4), 1006-1019.
	Construction and Building Materials	2012	Operational	Functions value/utility	Model/Function	Materials	Building and transportation	25	5	del Caño, A., Gómez, D., & de la Cruz, M. P. (2012). Uncertainty analysis in the sustainable design of concrete structures: A probabilistic method. Construction and Building Materials, 37, 865-873.
	International Journal of Production Economics	2015	Strategic	Areas of Interventions	Model/Function	Products	Generic/Undefined	6	3	Ding, H., Zhao, Q., An, Z., Xu, J., & Liu, Q. (2015). Pricing strategy of environmental sustainable supply chain with internalizing externalities. International Journal of Production Economics, 170, 563-575.
	Journal of Manufacturing Technology Management	2012	Operational	DM Drivers	Model/Function	Materials	Generic/Undefined	4	0.8	Djassemi, M. (2012). A computer-aided approach to material selection and environmental auditing. Journal of Manufacturing Technology Management, 23(6), 704-716.
	Journal of Cleaner Production	2013	Strategic	Sustainability score	Indicator	Company	Generic/Undefined	72	18	Egilmez, G., Kucukvar, M., & Tatari, O. (2013). Sustainability assessment of US manufacturing sectors: an economic input output-based frontier approach. Journal of Cleaner Production, 53, 91-102.
	Management Research Review	2011	Tactical	Supply chain KPI	Model/Function	Products	Generic/Undefined	75	12.5	El Saadany, A. M. A., Jaber, M. Y., & Bonney, M. (2011). Environmental performance measures for supply chains. Management Research Review, 34(11), 1202-1221.
	Journal of Cleaner Production	2014	Tactical	Manufacturing KPI	Model/Function	Products	Advanced Engineering	57	19	Faulkner, W., & Badurdeen, F. (2014). Sustainable Value Stream Mapping (Sus-VSM): methodology to visualize and assess manufacturing sustainability performance. Journal of Cleaner Production, 85, 8-18.
	Supply Chain Management	2012	Strategic	Areas of Interventions	Review/Themes	Company	Generic/Undefined	58	11.6	Fearne, A., Garcia Martinez, M., & Dent, B. (2012). Dimensions of sustainable value chains: implications for value chain analysis. Supply Chain Management: An International Journal, 17(6), 575-581.
	Proceedings of the Institution of Civil Engineers: Engineering Sustainability	2008	Tactical	Project KPI	Indicator	Projects	Building and transportation	21	2.33333	Fellows, R., & Liu, A. (2008, December). Impact of participants’ values on construction sustainability. In Proceedings of the Institution of Civil Engineers–Engineering Sustainability (Vol. 161, No. 4, pp. 219-227).
	Benchmarking	2016	Tactical	Supply chain KPI	Model/Function	Products	Automotive and machineries	0	0	Ferreira, L. M. D., Silva, C., & Azevedo, S. G. (2016). An environmental balanced scorecard for supply chain performance measurement (Env_BSC_4_SCPM). Benchmarking: An International Journal, 23(6), 1398-1422.
	International Journal of Production Economics	2012	Strategic	Sustainability score	Indicator	Company	Automotive and machineries	65	13	Figge, F., & Hahn, T. (2012). Is green and profitable sustainable? Assessing the trade-off between economic and environmental aspects. International Journal of Production Economics, 140(1), 92-102.
	Construction Innovation	2013	Operational	DM Drivers	Indicator	Materials	Building and transportation	4	1	Florez, L., Castro, D., & Irizarry, J. (2013). Measuring sustainability perceptions of construction materials. Construction Innovation, 13(2), 217-234.
	Journal of Cleaner Production	2016	Strategic	Areas of Interventions	Review/Themes	Processes and assets	Automotive and machineries	10	10	Ford, S., & Despeisse, M. (2016). Additive manufacturing and sustainability: an exploratory study of the advantages and challenges. Journal of Cleaner Production, 137, 1573-1587.
	Journal of Cleaner Production	2017	Strategic	Business transformation	Framework/Roadmap	Company	Generic/Undefined	3	3	França, C. L., Broman, G., Robèrt, K. H., Basile, G., & Trygg, L. (2017). An approach to business model innovation and design for strategic sustainable development. Journal of Cleaner Production, 140, 155-166.
	Ecological indicators	2014	Operational	Qualitative models	Indicator	Materials	Commodities and consumer products	2	0.666667	Fujii, M., Hayashi, K., Ito, H., & Ooba, M. (2014). The resource occupancy to capacity ratio indicator—A common unit to measure sustainability. Ecological Indicators, 46, 52-58.
	Journal of Accounting and Organizational Change	2012	Strategic	KPI measurement	Survey/Experiment	Company	Generic/Undefined	26	5.2	Gadenne, D., Mia, L., Sands, J., Winata, L., & Hooi, G. (2012). The influence of sustainability performance management practices on organisational sustainability performance. Journal of Accounting & Organizational Change, 8(2), 210-235.
	Journal of Cleaner Production	2016	Strategic	Business transformation	Framework/Roadmap	Company	Generic/Undefined	4	4	Geissdoerfer, M., Bocken, N. M., & Hultink, E. J. (2016). Design thinking to enhance the sustainable business modelling process–A workshop based on a value mapping process. Journal of Cleaner Production, 135, 1218-1232.
	Expert Systems with Applications	2012	Operational	Functions value/utility	Matrix	Projects	Building and transportation	30	6	Gervásio, H., & da Silva, L. S. (2012). A probabilistic decision-making approach for the sustainable assessment of infrastructures. Expert Systems with Applications, 39(8), 7121-7131.
	International Journal of Engineering Education	2007	Operational	Qualitative models	Model/Function	Products	Commodities and consumer products	6	0.6	Gheorghe, R., & Xirouchakis, P. (2007). Decision-based methods for early phase sustainable product design. International Journal of Engineering Education, 23(6), 1065-1080.
	Supply Chain Management	2012	Strategic	Areas of Interventions	Framework/Roadmap	Company	Generic/Undefined	190	38	Gimenez, C., & Tachizawa, E. M. (2012). Extending sustainability to suppliers: a systematic literature review. Supply Chain Management: An International Journal, 17(5), 531-543.
	Manufacturing and Service Operations Management	2013	Strategic	Business transformation	Framework/Roadmap	Company	Generic/Undefined	40	10	Girotra, K., & Netessine, S. (2013). OM Forum-Business Model Innovation for Sustainability. Manufacturing & Service Operations Management, 15(4), 537-544.
	Business Ethics	2017	Strategic	Value creation areas	Survey/Experiment	Company	Generic/Undefined	0	0	Gómez‐Bezares, F., Przychodzen, W., & Przychodzen, J. (2017). Bridging the gap: How sustainable development can help companies create shareholder value and improve financial performance. Business Ethics: A European Review, 26(1), 1-17.
	International Journal of Environmental Technology and Management	2008	Metalevel	Customer perception	Survey/Experiment	Products	Commodities and consumer products	4	0.444444	Gotzsch, J. (2008). Key aspects of product attraction: a focus on eco-friendliness. International Journal of Environmental Technology and Management, 8(1), 37-52.
	Journal of Mechanical Design, Transactions of the ASME	2015	Metalevel	Customer perception	Survey/Experiment	Products	Commodities and consumer products	6	3	Goucher-Lambert, K., & Cagan, J. (2015). The Impact of Sustainability on Consumer Preference Judgments of Product Attributes. Journal of Mechanical Design, 137(8), 081401.
	Ecological Indicators	2016	Tactical	Supply chain KPI	Model/Function	Processes and assets	Generic/Undefined	5	5	Govindan, K., Paam, P., & Abtahi, A. R. (2016). A fuzzy multi-objective optimization model for sustainable reverse logistics network design. Ecological Indicators, 67, 753-768.
	Industrial Management and Data Systems	2012	Tactical	Supply chain KPI	Survey/Experiment	Products	Generic/Undefined	52	10.4	Green Jr, K. W., Zelbst, P. J., Bhadauria, V. S., & Meacham, J. (2012). Do environmental collaboration and monitoring enhance organizational performance?. Industrial Management & Data Systems, 112(2), 186-205.
	Journal of Engineering, Design and Technology	2013	Operational	DM Drivers	Review/Themes	Products	Automotive and machineries	14	3.5	Gudem, M., Steinert, M., Welo, T., & Leifer, L. (2013). Redefining customer value in lean product development design projects. Journal of Engineering, Design and Technology, 11(1), 71-89.
	Journal of Consumer Marketing	2011	Metalevel	Customer perception	Survey/Experiment	Products	Commodities and consumer products	55	9.16667	Ha-Brookshire, J. E., & Norum, P. S. (2011). Willingness to pay for socially responsible products: case of cotton apparel. Journal of Consumer Marketing, 28(5), 344-353.
	European Journal of Innovation Management	2011	Strategic	Areas of Interventions	Review/Themes	Products	Automotive and machineries	53	8.83333	Halila, F., & Rundquist, J. (2011). The development and market success of eco-innovations: A comparative study of eco-innovations and “other” innovations in Sweden. European Journal of Innovation Management, 14(3), 278-302.
	Energy Policy	2010	Metalevel	Customer perception	Survey/Experiment	Products	Commodities and consumer products	83	11.8571	Hamzaoui Essoussi, L., & Linton, J. D. (2010). New or recycled products: how much are consumers willing to pay?. Journal of Consumer Marketing, 27(5), 458-468.
	Ecological indicators	2015	Strategic	Value creation areas	Survey/Experiment	Company	Generic/Undefined	4	2	Hang, S., & Chunguang, Z. (2015). Does environmental management improve enterprise's value?–An empirical research based on Chinese listed companies. Ecological Indicators, 51, 191-196.
	Journal of Business Ethics	2016	Strategic	KPI measurement	Review/Themes	Company	Generic/Undefined	25	25	Hansen, E.G., Schaltegger, S.,"The Sustainability Balanced Scorecard: A Systematic Review of Architectures",2016,"Journal of Business Ethics",133,2,,193,221,,4,10.1007/s10551-014-2340-3,"https://www.scopus.com/inward/record.url?eid=2-s2.0-84957587933&partnerID=40&md5=165b97ffb629a8c3d8f8fce7607b62f5",Article,Scopus,2-s2.0-84957587933
	International Journal of Production Research	2015	Strategic	Sustainability score	Indicator	Company	Commodities and consumer products	11	5.5	Harik, R., El Hachem, W., Medini, K., & Bernard, A. (2015). Towards a holistic sustainability index for measuring sustainability of manufacturing companies. International Journal of Production Research, 53(13), 4117-4139.
	Clean Technologies and Environmental Policy	2016	Operational	Qualitative models	Model/Function	Products	Commodities and consumer products	1	1	Hassan, M. F., Saman, M. Z. M., Sharif, S., & Omar, B. (2016). Sustainability evaluation of alternative part configurations in product design: weighted decision matrix and artificial neural network approach. Clean Technologies and Environmental Policy, 18(1), 63-79.
	Journal of Cleaner Production	2013	Strategic	Business transformation	Review/Themes	Company	Generic/Undefined	44	11	Heikkurinen, P., & Bonnedahl, K. J. (2013). Corporate responsibility for sustainable development: a review and conceptual comparison of market-and stakeholder-oriented strategies. Journal of Cleaner Production, 43, 191-198.
	Journal of Cleaner Production	2015	Strategic	Sustainability score	Methodology	Products	Automotive and machineries	28	14	Henriques, J., & Catarino, J. (2015). Sustainable value and cleaner production–research and application in 19 Portuguese SME. Journal of Cleaner Production, 96, 379-386.
	Journal of Engineering and Technology Management	2011	Operational	Qualitative models	Matrix	Products	Commodities and consumer products	10	1.66667	Henry, M., & Kato, Y. (2011). An assessment framework based on social perspectives and Analytic Hierarchy Process: A case study on sustainability in the Japanese concrete industry. Journal of Engineering and Technology Management, 28(4), 300-316.
	International Journal of Operations and Production Management	2016	Strategic	Areas of Interventions	Framework/Roadmap	Products	Generic/Undefined	5	5	Hsu, C. C., Tan, K. C., & Mohamad Zailani, S. H. (2016). Strategic orientations, sustainable supply chain initiatives, and reverse logistics: empirical evidence from an emerging market. International Journal of Operations & Production Management, 36(1), 86-110.
	Research in Engineering Design	2015	Operational	Simulation/Optimization	Model/Function	Products	Advanced Engineering	12	6	Hu, J., & Cardin, M. A. (2015). Generating flexibility in the design of engineering systems to enable better sustainability and lifecycle performance. Research in Engineering Design, 26(2), 121-143.
	International Journal of Supply Chain Management	2014	Operational	Qualitative models	Model/Function	Products	Commodities and consumer products	3	1	Inoue, M., Yamada, S., Yamada, T., & Bracke, S. (2014). An Upgradable Product Design Method for Improving Performance, CO2 Savings, and Production Cost Reduction: Vacuum Cleaner Case Study. International Journal of Supply Chain Management, 3(4).
	Journal of Engineering, Design and Technology	2016	Operational	Cost-based models	Model/Function	Processes and assets	Automotive and machineries	0	0	Jayakrishna, K., Jayakrishna, K., Girubha, R. J., Girubha, R. J., Vinodh, S., & Vinodh, S. (2016). Comparison of sustainability characteristics of conventional and CNC turning processes: A case study. Journal of Engineering, Design and Technology, 14(3), 422-445.
	Journal of Modelling in Management	2015	Operational	Qualitative models	Matrix	Products	Automotive and machineries	2	1	Jayakrishna, K., Vimal, K.E.K, Vinodh S., (2015),"ANP based sustainable concept selection", Journal of Modelling in Management, Vol. 10 Iss 1 pp. 118 - 136
	International Journal of Sustainable Engineering	2016	Strategic	KPI measurement	Indicator	Company	Automotive and machineries	1	1	Jayakrishna, K., Vinodh, S., & Anish, S. (2016). A Graph Theory approach to measure the performance of sustainability enablers in a manufacturing organization. International Journal of Sustainable Engineering, 9(1), 47-58.
	Building and Environment	2015	Operational	Visualization	Model/Function	Projects	Building and transportation	9	4.5	Jensen, P. A., & Maslesa, E. (2015). Value based building renovation–A tool for decision-making and evaluation. Building and Environment, 92, 1-9.
	International Journal of Computer Integrated Manufacturing	2008	Operational	Qualitative models	Methodology	Products	Automotive and machineries	18	2	Jianjun, Y., Baiyang, J., Yifeng, G., Jinxiang, D., & Chenggang, L. (2008). Research on evaluation methodologies of product life cycle engineering design (LCED) and development of its tools. International Journal of Computer Integrated Manufacturing, 21(8), 923-942.
	Journal of Environmental Management	2016	Strategic	KPI measurement	Framework/Roadmap	Products	Commodities and consumer products	0	0	Journeault, M. (2016). The Integrated Scorecard in support of corporate sustainability strategies. Journal of environmental management, 182, 214-229.
	Journal of Cleaner Production	2016	Strategic	Business transformation	Framework/Roadmap	Products	Commodities and consumer products	19	19	Joyce, A., Paquin, R.L.,"The triple layered business model canvas: A tool to design more sustainable business models",2016,"Journal of Cleaner Production",135,,,1474,1486,,,10.1016/j.jclepro.2016.06.067,"https://www.scopus.com/inward/record.url?eid=2-s2.0-84977503586&partnerID=40&md5=f77b1cd00de918ca929db81b2c9d06d2",Article,Scopus,2-s2.0-84977503586
	Journal of Manufacturing Technology Management	2014	Operational	Qualitative models	Survey/Experiment	Products	Generic/Undefined	13	4.33333	Kara, S., Ibbotson, S., & Kayis, B. (2014). Sustainable product development in practice: an international survey. Journal of Manufacturing Technology Management, 25(6), 848-872.
	Journal on Chain and Network Science	2011	Tactical	Manufacturing KPI	Model/Function	Products	Automotive and machineries	2	0.333333	Kassahun, A., du Chatenier, E., Bots, P., Hofstede, G., Bloemhof, J., Scholten, H., Korver S. & Beulens, A. (2011). QChain–integrating social, environmental and economic value: a tool to support innovation in production chains. Journal on Chain and Network Science, 11(2), 167-176.
	California Management Review	2013	Strategic	KPI measurement	Survey/Experiment	Services and PSS	Automotive and machineries	55	13.75	Kastalli, I. V., Van Looy, B., & Neely, A. (2013). Steering manufacturing firms towards service business model innovation. California management review, 56(1), 100-123.
	Journal of Cleaner Production	2013	Strategic	Areas of Interventions	Survey/Experiment	Services and PSS	Automotive and machineries	45	11.25	Keskin, D., Diehl, J. C., & Molenaar, N. (2013). Innovation process of new ventures driven by sustainability. Journal of Cleaner Production, 45, 50-60.
	Service Business	2016	Strategic	BM selection	Indicator	Services and PSS	Generic/Undefined	2	2	Kim, K. J., Lim, C. H., Heo, J. Y., Lee, D. H., Hong, Y. S., & Park, K. (2016). An evaluation scheme for product–service system models: development of evaluation criteria and case studies. Service Business, 10(3), 507-530.
	Journal of Cleaner Production	2017	Operational	Qualitative models	Model/Function	Products	Commodities and consumer products	0	0	Kim, S., & Moon, S. K. (2016). Sustainable platform identification for product family design. Journal of Cleaner Production, 143, 567-581.
	International Journal of Sustainable Engineering	2016	Metalevel	Customer perception	Survey/Experiment	Products	Automotive and machineries	0	0	Kim, S., Cho, Y., Niki, K., & Yamanaka, T. (2016). Integrating affective values to sustainable behaviour focused on Kansei engineering. International Journal of Sustainable Engineering, 9(6), 378-389.
	CIRP Journal of Manufacturing Science and Technology	2009	Operational	Functions value/utility	Model/Function	Services and PSS	Advanced Engineering	49	6.125	Kimita, K., Shimomura, Y., & Arai, T. (2009). A customer value model for sustainable service design. CIRP Journal of Manufacturing Science and Technology, 1(4), 254-261.
	European Business Review	2013	Strategic	Value creation areas	Review/Themes	Products	Commodities and consumer products	18	4.5	Kronborg Jensen J., Balslev Munksgaard, K., & Stentoft Arlbjørn, J. (2013). Chasing value offerings through green supply chain innovation. European Business Review, 25(2), 124-146.
	Journal of Cleaner Production	2016	Strategic	Value creation areas	Survey/Experiment	Products	Automotive and machineries	3	3	Kumar, D., & Rahman, Z. (2016). Buyer supplier relationship and supply chain sustainability: empirical study of Indian automobile industry. Journal of Cleaner Production, 131, 836-848.
	Ecological Economics	2009	Strategic	Sustainability score	Indicator	Company	Generic/Undefined	84	10.5	Kuosmanen, T., & Kuosmanen, N. (2009). How not to measure sustainable value (and how one might). Ecological Economics, 69(2), 235-243.
	Business Strategy and the Environment	2013	Strategic	Areas of Interventions	Review/Themes	Company	Generic/Undefined	37	9.25	Kurapatskie, B., & Darnall, N. (2013). Which corporate sustainability activities are associated with greater financial payoffs?. Business strategy and the environment, 22(1), 49-61.
	Problemy Ekorozwoju	2008	Strategic	Value creation areas	Framework/Roadmap	Products	Generic/Undefined	214	23.7778	Laszlo, C. (2008). Sustainable value: How the world's leading companies are doing well by doing good. Stanford University Press.
	Advances in Appreciative Inquiry	2007	Strategic	Value creation areas	Methodology	Products	Generic/Undefined	19	1.9	Laszlo, C., & Cooperrider, D. L. (2008). Design for sustainable value: A whole system approach. Advances in appreciative inquiry, 2, 15-29.
	International Journal of Advanced Manufacturing Technology	2013	Tactical	Manufacturing KPI	Model/Function	Products	Automotive and machineries	53	13.25	Le Bourhis, F., Kerbrat, O., Hascoët, J. Y., & Mognol, P. (2013). Sustainable manufacturing: evaluation and modeling of environmental impacts in additive manufacturing. The International Journal of Advanced Manufacturing Technology, 69(9-12), 1927-1939.
	Journal of Cleaner Production	2017	Strategic	Areas of Interventions	Survey/Experiment	Products	Commodities and consumer products	2	2	Li, D., Zheng, M., Cao, C., Chen, X., Ren, S., & Huang, M. (2017). The impact of legitimacy pressure and corporate profitability on green innovation: Evidence from China top 100. Journal of Cleaner Production, 141, 41-49.
	Journal of Cleaner Production	2011	Metalevel	Sust. Framework	Survey/Experiment	Products	Commodities and consumer products	53	8.83333	Lindsey, T. C. (2011). Sustainable principles: common values for achieving sustainability. Journal of Cleaner Production, 19(5), 561-565.
	Journal of Manufacturing Technology Management	2007	Tactical	Manufacturing KPI	Indicator	Products	Building and transportation	47	4.7	Liyanage, J.P. 2007, "Operations and maintenance performance in production and manufacturing assets: The sustainability perspective", Journal of Manufacturing Technology Management, vol. 18, no. 3, pp. 304-314.
	Construction and Building Materials	2010	Operational	Functions value/utility	Model/Function	Projects	Building and transportation	41	5.85714	Lombera, J. T. S. J., & Rojo, J. C. (2010). Industrial building design stage based on a system approach to their environmental sustainability. Construction and Building Materials, 24(4), 438-447.
	International Journal of Advanced Manufacturing Technology	2016	Operational	Cost-based models	Model/Function	Products	Commodities and consumer products	1	1	Ma, J., & Kremer, G. E. O. (2016). A sustainable modular product design approach with key components and uncertain end-of-life strategy consideration. The International Journal of Advanced Manufacturing Technology, 85(1-4), 741-763.
	Structural Survey	2016	Operational	Cost-based models	Model/Function	Projects	Building and transportation	0	0	Malmgren, L., Elfborg, S., & Mjörnell, K. (2016). Development of a decision support tool for sustainable renovation–a case study. Structural Survey, 34(1), 3-11.
	Journal of Manufacturing Technology Management	2014	Operational	Simulation/Optimization	Review/Themes	Processes and assets	Generic/Undefined	13	4.33333	Marchet, G., Melacini, M., & Perotti, S. (2014). Environmental sustainability in logistics and freight transportation: A literature review and research agenda. Journal of Manufacturing Technology Management, 25(6), 775-811.
	Review of Marketing Research	2016	Metalevel	Customer perception	Survey/Experiment	Products	Automotive and machineries	0	0	Martin, D. M., & Väistö, T. (2016). Reducing the Attitude-Behavior Gap in Sustainable Consumption: A Theoretical Proposition and the American Electric Vehicle Market. In Marketing in and for a Sustainable Society (pp. 193-213). Emerald Group Publishing Limited, Chicago
	Business Strategy and the Environment	2015	Strategic	Areas of Interventions	Review/Themes	Company	Generic/Undefined	15	7.5	Martínez‐Ferrero, J., & Frías‐Aceituno, J. V. (2015). Relationship between sustainable development and financial performance: international empirical research. Business Strategy and the Environment, 24(1), 20-39.
	Journal of Cleaner Production	2013	Operational	DM Drivers	Matrix	Materials	Automotive and machineries	26	6.5	Mayyas, A. T., Qattawi, A., Mayyas, A. R., & Omar, M. (2013). Quantifiable measures of sustainability: a case study of materials selection for eco-lightweight auto-bodies. Journal of Cleaner Production, 40, 177-189.
	International Journal of Sustainable Development and World Economy	2009	Operational	Qualitative models	Matrix	Projects	Agriculture and mining	15	1.875	Mendoza, G. A., & Prabhu, R. (2009). Evaluating multi-stakeholder perceptions of project impacts: a participatory value-based multi-criteria approach. International Journal of Sustainable Development & World Ecology, 16(3), 177-190.
	Measuring Business Excellence	2010	Strategic	Sustainability score	Indicator	Company	Automotive and machineries	15	2.14286	Menzel, V., Smagin, J., & David, F. (2010). Can companies profit from greener manufacturing?. Measuring Business Excellence, 14(2), 22-31.
	Benchmarking	2016	Strategic	Sustainability score	Indicator	Company	Generic/Undefined	0	0	Metaxas, I. N., Koulouriotis, D. E., & Spartalis, S. H. (2016). A multicriteria model on calculating the Sustainable Business Excellence Index of a firm with fuzzy AHP and TOPSIS. Benchmarking: An International Journal, 23(6), 1522-1557.
	Business Strategy and the Environment	2011	Metalevel	Customer perception	Survey/Experiment	Products	Commodities and consumer products	67	11.1667	Michaud, C., & Llerena, D. (2011). Green consumer behaviour: an experimental analysis of willingness to pay for remanufactured products. Business Strategy and the Environment, 20(6), 408-420.
	EuroChoices	2011	Strategic	Sustainability score	Indicator	Company	Agriculture and mining	11	1.83333	Mondelaers, K., Van Huylenbroeck, G., & Lauwers, L. (2011). Sustainable Value Analysis: Sustainability in a New Light Results of the EU SVAPPAS Project Analyse de la valeur durable: Le projet SVAPPAS de l’Union européenne éclaire la durabilité sous un jour nouveau Sustainable‐Value‐Analyse: Nachhaltigkeit in einem neuen Licht als Ergebnis des SVAPPAS‐Projekts der EU. EuroChoices, 10(2), 9-15.
	Journal of Cleaner Production	2009	Strategic	Value creation areas	Framework/Roadmap	Company	Generic/Undefined	233	29.125	Moore, S. B., & Manring, S. L. (2009). Strategy development in small and medium sized enterprises for sustainability and increased value creation. Journal of cleaner production, 17(2), 276-282.
	Journal of Cleaner Production	2016	Strategic	KPI measurement	Survey/Experiment	Company	Generic/Undefined	5	5	Morioka, S. N., & Carvalho, M. M. (2016). Measuring sustainability in practice: exploring the inclusion of sustainability into corporate performance systems in Brazilian case studies. Journal of Cleaner Production, 136, 123-133.
	Journal of Cleaner Production	2016	Strategic	Business transformation	Framework/Roadmap	Company	Generic/Undefined	6	6	Morioka, S. N., & de Carvalho, M. M. (2016). A systematic literature review towards a conceptual framework for integrating sustainability performance into business. Journal of Cleaner Production, 136, 134-146.
	Handbook of Research on Global Supply Chain Management	2016	Metalevel	Sust. Framework	Review/Themes	Company	Generic/Undefined	2	2	Mukherjee, A., Kamarulzaman, N. H., Vijayan, G., & Vaiappuri, S. K. (2015). Sustainability: A Comprehensive Literature. Handbook of Research on Global Supply Chain Management, 248.
	International Journal of Innovation Science	2012	Strategic	Business transformation	Methodology	Products	Generic/Undefined	10	2	Müller, M. (2012). Design-driven innovation for sustainability: a new method for developing a sustainable value proposition. International Journal of Innovation Science, 4(1), 11-24.
	International Journal of Engineering Research in Africa	2016	Strategic	Sustainability score	Indicator	Products	Automotive and machineries	8	8	Nallusamy, S., Ganesan, M., Balakannan, K., & Shankar, C. (2016). Environmental sustainability evaluation for an automobile manufacturing industry using multi-grade fuzzy approach. In International Journal of Engineering Research in Africa (Vol. 19, pp. 123-129). Trans Tech Publications.
	Building Research and Information	2007	Operational	Qualitative models	Matrix	Projects	Automotive and machineries	60	6	Nelms, C. E., Russell, A. D., & Lence, B. J. (2007). Assessing the performance of sustainable technologies: a framework and its application. Building Research & Information, 35(3), 237-251.
	International Journal of Innovation and Sustainable Development	2012	Operational	Qualitative models	Matrix	Processes and assets	Generic/Undefined	6	1.2	Ojanen, V., Ahonen, T., Reunanen, M., & Hanski, J. (2012). Towards availability and sustainability in customer value assessment of asset management services. International Journal of Innovation and Sustainable Development, 6(4), 368-391.
	Clean Technologies and Environmental Policy	2014	Operational	Functions value/utility	Model/Function	Processes and assets	Automotive and machineries	5	1.66667	Olinto, A. C. (2014). Vector space theory of sustainability assessment of industrial processes. Clean Technologies and Environmental Policy, 16(8), 1815-1820.
	Journal of Product Innovation Management	2013	Strategic	BM selection	Model/Function	Products	Automotive and machineries	14	3.5	Olson, E. L. (2013). Perspective: the green innovation value chain: a tool for evaluating the diffusion prospects of green products. Journal of Product Innovation Management, 30(4), 782-793.
	Journal of Manufacturing Technology Management	2015	Operational	Simulation/Optimization	Model/Function	Products	Automotive and machineries	3	1.5	Orji, I. J., & Wei, S. (2015). Dynamic modeling of sustainable operation in green manufacturing environment. Journal of Manufacturing Technology Management, 26(8), 1201-1217.
	Journal of Industrial Engineering and Management	2014	Operational	Simulation/Optimization	Matrix	Products	Automotive and machineries	12	4	Orji, I., & Wei, S. (2014). A decision support tool for sustainable supplier selection in manufacturing firms. Journal of Industrial Engineering and Management, 7(5), 1293.
	Supply Chain Management	2014	Tactical	Supply chain KPI	Survey/Experiment	Company	Generic/Undefined	20	6.66667	Ortas, E., M. Moneva, J., & Álvarez, I. (2014). Sustainable supply chain and company performance: a global examination. Supply Chain Management: An International Journal, 19(3), 332-350.
	Advances in Appreciative Inquiry	2010	Strategic	Areas of Interventions	Review/Themes	Company	Automotive and machineries	1	0.142857	Osch, W., & Avital, M. (2010). The road to Sustainable Value: The path-dependent construction of sustainable innovation as sociomaterial practices in the car industry.
	Energy Policy	2011	Metalevel	Customer perception	Survey/Experiment	Products	Commodities and consumer products	191	31.8333	Ozaki, R., & Sevastyanova, K. (2011). Going hybrid: An analysis of consumer purchase motivations. Energy Policy, 39(5), 2217-2227.
	Corporate Governance	2016	Strategic	Business transformation	Survey/Experiment	Company	Generic/Undefined	5	5	Padin, C., Padin, C., Ferro, C., Ferro, C., Wagner, B., Wagner, B., ... & Svensson, G. (2016). Validating a triple bottom line construct and reasons for implementing sustainable business practices in companies and their business networks. Corporate Governance: The International Journal of Business in Society, 16(5), 849-865.
	Business Process Management Journal	2015	Strategic	KPI measurement	Framework/Roadmap	Company	Generic/Undefined	4	2	Pádua, S. I. D., & Jabbour, C. J. C. (2015). Promotion and evolution of sustainability performance measurement systems from a perspective of business process management: From a literature review to a pentagonal proposal. Business Process Management Journal, 21(2), 403-418. Chicago
	European Journal of Operational Research	2015	Strategic	KPI measurement	Model/Function	Services and PSS	Generic/Undefined	22	11	Pan, J. N., & Nguyen, H. T. N. (2015). Achieving customer satisfaction through product–service systems. European Journal of Operational Research, 247(1), 179-190.
	EuroMed Journal of Business	2014	Strategic	Value creation areas	Survey/Experiment	Products	Commodities and consumer products	1	0.333333	Papadopoulos, I., Karagouni, G., Trigkas, M., & Beltsiou, Z. (2014). Mainstreaming green product strategies: Why and how furniture companies integrate environmental sustainability?. EuroMed Journal of Business, 9(3), 293-317.
	Industrial Marketing Management	2016	Strategic	BM selection	Framework/Roadmap	Products	Automotive and machineries	3	3	Patala, S., Jalkala, A., Keränen, J., Väisänen, S., Tuominen, V., & Soukka, R. (2016). Sustainable value propositions: Framework and implications for technology suppliers. Industrial Marketing Management, 59, 144-156.
	Proceedings of the Institution of Civil Engineers: Engineering Sustainability	2012	Metalevel	Sust. Framework	Survey/Experiment	Products	Commodities and consumer products	12	2.4	Pearce, O. J., Murray, N. J., & Boyd, T. W. (2012, June). Halstar: systems engineering for sustainable development. In Proceedings of the Institution of Civil Engineers-Engineering Sustainability (Vol. 165, No. 2, pp. 129-140). Thomas Telford Ltd.
	International Journal of Agile Systems and Management	2014	Operational	Functions value/utility	Model/Function	Services and PSS	Automotive and machineries	20	6.66667	Peruzzini, M., & Germani, M. (2014). Design for sustainability of product-service systems. International Journal of Agile Systems and Management 20, 7(3-4), 206-219.
	International Journal of Agile Systems and Management	2015	Operational	Qualitative models	Matrix	Services and PSS	Commodities and consumer products	3	1.5	Peruzzini, M., Marilungo, E., & Germani, M. (2015). Structured requirements elicitation for product-service system. International Journal of Agile Systems and Management, 8(3-4), 189-218.
	TQM Magazine	2007	Tactical	Manufacturing KPI	ISO Standard	Company	Commodities and consumer products	64	6.4	Petros Sebhatu, S., & Enquist, B. (2007). ISO 14001 as a driving force for sustainable development and value creation. The TQM Magazine, 19(5), 468-482.
	Technological, Managerial and Organizational Core Competencies: Dynamic Innovation and Sustainable Development	2011	Strategic	Business transformation	Framework/Roadmap	Company	Generic/Undefined	4	0.666667	Rainey, D. L. (2011). A Model for Improving the Adoption of Sustainability in the Context of Globalization and Innovation. Technological, Managerial and Organizational Core Competencies: Dynamic Innovation and Sustainable Development: Dynamic Innovation and Sustainable Development, 18.
	Handbook of Research on Sustainable Development and Economics	2015	Strategic	Business transformation	Review/Themes	Company	Generic/Undefined	0	0	Rainey, D. L. (2015). A Holistic Model for Linking Sustainability, Sustainable Development, and Strategic Innovation in the Context of Globalization. Handbook of Research on Sustainable Development and Economics, 222.
	International Journal of Information Technology and Decision Making	2017	Tactical	Supply chain KPI	Model/Function	Products	Generic/Undefined	0	0	Rao, C., Goh, M., & Zheng, J. (2016). Decision Mechanism for Supplier Selection Under Sustainability. International Journal of Information Technology & Decision Making, 1-29.
	Management Research Review	2012	Metalevel	Customer perception	Survey/Experiment	Products	Commodities and consumer products	23	4.6	Raska, D., & Shaw, D. (2012). When is going green good for company image?. Management Research Review, 35(3/4), 326-347.
	Organization and Environment	2015	Strategic	Areas of Interventions	Framework/Roadmap	Services and PSS	Building and transportation	2	1	Roome, N., & Louche, C. (2015). Journeying Toward Business Models for Sustainability A Conceptual Model Found Inside the Black Box of Organisational Transformation. Organization & Environment, 1086026615595084.
	Journal of Cleaner Production	2015	Operational	Qualitative models	Model/Function	Projects	Building and transportation	31	15.5	Russell-Smith, S. V., Lepech, M. D., Fruchter, R., & Meyer, Y. B. (2015). Sustainable target value design: integrating life cycle assessment and target value design to improve building energy and environmental performance. Journal of Cleaner Production, 88, 43-51.
	Journal of Cleaner Production	2007	Operational	DM Drivers	Methodology	Services and PSS	Commodities and consumer products	314	31.4	Sakao, T., & Shimomura, Y. (2007). Service Engineering: a novel engineering discipline for producers to increase value combining service and product. Journal of Cleaner Production, 15(6), 590-604.
	Accounting Research Journal	2016	Strategic	KPI measurement	Framework/Roadmap	Company	Generic/Undefined	0	0	Sands, J. S., Sands, J. S., Rae, K. N., Rae, K. N., Gadenne, D., & Gadenne, D. (2016). An empirical investigation on the links within a sustainability balanced scorecard (SBSC) framework and their impact on financial performance. Accounting Research Journal, 29(2), 154-178.
	International Journal of Innovation and Sustainable Development	2012	Strategic	Business transformation	Framework/Roadmap	Products	Generic/Undefined	244	48.8	Schaltegger, S., Lüdeke-Freund, F., & Hansen, E. G. (2012). Business cases for sustainability: the role of business model innovation for corporate sustainability. International Journal of Innovation and Sustainable Development, 6(2), 95-119.
	Measuring Business Excellence	2009	Strategic	KPI measurement	Methodology	Company	Generic/Undefined	28	3.5	Searcy, C. (2009). Setting a course in corporate sustainability performance measurement. Measuring Business Excellence, 13(3), 49-57.
	Journal of Cleaner Production	2017	Strategic	Value creation areas	Survey/Experiment	Products	Automotive and machineries	2	2	Severo, E. A., de Guimarães, J. C. F., & Dorion, E. C. H. (2017). Cleaner production and environmental management as sustainable product innovation antecedents: A survey in Brazilian industries. Journal of Cleaner Production, 142, 87-97.
	International Journal of Advanced Manufacturing Technology	2016	Strategic	BM selection	Model/Function	Processes and assets	Generic/Undefined	5	5	Singh, S., Olugu, E. U., Musa, S. N., Mahat, A. B., & Wong, K. Y. (2016). Strategy selection for sustainable manufacturing with integrated AHP-VIKOR method under interval-valued fuzzy environment. The International Journal of Advanced Manufacturing Technology, 84(1-4), 547-563.
	Clean Technologies and Environmental Policy	2014	Operational	Functions value/utility	Model/Function	Processes and assets	Generic/Undefined	15	5	Smith, R. L., & Ruiz-Mercado, G. J. (2014). A method for decision making using sustainability indicators. Clean Technologies and Environmental Policy, 16(4), 749-755.
	Environmental and Resource Economics	2014	Metalevel	Customer perception	Survey/Experiment	Products	Commodities and consumer products	6	2	Soltmann, C., Stucki, T., & Woerter, M. (2015). The Impact of Environmentally Friendly Innovations on Value Added. Environmental and Resource Economics, 62(3), 457-479.
	Journal of Cleaner Production	2017	Operational	Qualitative models	Model/Function	Services and PSS	Automotive and machineries	2	2	Song, W., & Sakao, T. (2017). A customization-oriented framework for design of sustainable product/service system. Journal of Cleaner Production, 140, 1672-1685.
	International Journal for Quality Research	2014	Operational	Qualitative models	Review/Themes	Products	Generic/Undefined	2	0.666667	Soota, T. (2014). Integrated approach to multi-criteria decision making for sustainable product development. International Journal for Quality Research, 8(4).
	Journal of Cleaner Production	2015	Operational	Simulation/Optimization	Model/Function	Processes and assets	Commodities and consumer products	17	8.5	Sproedt, A., Plehn, J., Schönsleben, P., & Herrmann, C. (2015). A simulation-based decision support for eco-efficiency improvements in production systems. Journal of Cleaner Production, 105, 389-405.
	International Journal of Sustainable Engineering	2016	Operational	Simulation/Optimization	Model/Function	Products	Automotive and machineries	3	3	Suresh, P., Ramabalan, S., & Natarajan, U. (2016). Integration of DFE and DFMA for the sustainable development of an automotive component. International Journal of Sustainable Engineering, 9(2), 107-118.
	Journal of Cleaner Production	2010	Strategic	Sustainability score	Model/Function	Processes and assets	Agriculture and mining	72	10.2857	Tahir, A. C., & Darton, R. C. (2010). The process analysis method of selecting indicators to quantify the sustainability performance of a business operation. Journal of Cleaner Production, 18(16), 1598-1607.
	Journal of Industrial Ecology	2014	Operational	Simulation/Optimization	Model/Function	Materials	Generic/Undefined	11	3.66667	Tambouratzis, T., Karalekas, D., & Moustakas, N. (2014). A methodological study for optimizing material selection in sustainable product design. Journal of Industrial Ecology, 18(4), 508-516.
	Journal of Strategic Marketing	2012	Strategic	Areas of Interventions	Review/Themes	Company	Generic/Undefined	16	3.2	Tollin, K., & Vej, J. (2012). Sustainability in business: understanding meanings, triggers and enablers. Journal of Strategic Marketing, 20(7), 625-641.
	Journal of Strategic Marketing	2015	Strategic	Areas of Interventions	Survey/Experiment	Company	Generic/Undefined	1	0.5	Tollin, K., Christensen, L. B., & Wilke, R. (2015). Sustainability in business from a marketing perspective. Journal of Strategic Marketing, 23(6), 471-496.
	Environmental Monitoring and Assessment	2012	Metalevel	Customer perception	Survey/Experiment	Products	Commodities and consumer products	16	3.2	Tsai, M. T., Chuang, L. M., Chao, S. T., & Chang, H. P. (2012). The effects assessment of firm environmental strategy and customer environmental conscious on green product development. Environmental monitoring and assessment, 184(7), 4435-4447.
	CIRP Annals - Manufacturing Technology	2009	Strategic	BM selection	Review/Themes	Products	Generic/Undefined	164	20.5	Ueda, K., Takenaka, T., Váncza, J., & Monostori, L. (2009). Value creation and decision-making in sustainable society. CIRP Annals-Manufacturing Technology, 58(2), 681-700.
	Foresight	2014	Strategic	KPI measurement	Framework/Roadmap	Company	Generic/Undefined	5	1.66667	Valkokari, K., Valkokari, P., Palomäki, K., Uusitalo, T., Reunanen, M., Macchi, M., Rana, P. & Prasanna Liyanage, J. (2014). Road-mapping the business potential of sustainability within the European manufacturing industry. Foresight, 16(4), 360-384.
	Supply Chain Management	2014	Tactical	Supply chain KPI	Model/Function	Company	Commodities and consumer products	64	21.3333	Varsei, M., Soosay, C., Fahimnia, B., & Sarkis, J. (2014). Framing sustainability performance of supply chains with multidimensional indicators. Supply Chain Management: An International Journal, 19(3), 242-257.
	Materials and Design	2011	Operational	Visualization	Model/Function	Materials	Automotive and machineries	15	2.5	Vinodh, S., & Jayakrishna, K. (2011). Environmental impact minimisation in an automotive component using alternative materials and manufacturing processes. Materials & Design, 32(10), 5082-5090.
	Journal of Engineering, Design and Technology	2014	Operational	Qualitative models	Model/Function	Products	Automotive and machineries	6	2	Vinodh, S., & Rathod, G. (2014). Application of life cycle assessment and Monte Carlo simulation for enabling sustainable product design. Journal of Engineering, Design and Technology, 12(3), 307-315.
	Clean Technologies and Environmental Policy	2011	Operational	Qualitative models	Model/Function	Products	Building and transportation	52	8.66667	Vinodh, S., Arvind, K. R., & Somanaathan, M. (2011). Tools and techniques for enabling sustainability through lean initiatives. Clean Technologies and Environmental Policy, 13(3), 469-479.
	Clean Technologies and Environmental Policy	2016	Tactical	Manufacturing KPI	Model/Function	Products	Automotive and machineries	1	1	Vinodh, S., Ruben, R. B., & Asokan, P. (2016). Life cycle assessment integrated value stream mapping framework to ensure sustainable manufacturing: a case study. Clean Technologies and Environmental Policy, 18(1), 279-295.
	International Journal of Product Lifecycle Management	2011	Operational	DM Drivers	Model/Function	Products	Commodities and consumer products	2	0.333333	Wang, W., & Tseng, M. M. (2011). Design for sustainable manufacturing: applying modular design methodology to manage product end-of-life strategy. International journal of product lifecycle management, 5(2-4), 164-182.
	Handbook of Ethics, Values, and Technological Design: Sources, Theory, Values and Application Domains	2015	Operational	Simulation/Optimization	Model/Function	Services and PSS	Commodities and consumer products	0	0	Wever, R., & Vogtländer, J. (2015). Design for the Value of Sustainability Sustainability. Handbook of Ethics, Values, and Technological Design: Sources, Theory, Values and Application Domains, 513-549.
	International Journal of Automation Technology	2014	Operational	Simulation/Optimization	Model/Function	Materials	Automotive and machineries	1	0.333333	Whalen, K., & Peck, D. (2014). In the Loop: Sustainable, Circular Product Design and Critical Materials (Special Issue on Design and Manufacturing for Environmental Sustainability). International journal of automation technology, 8(5), 664-676.
	Journal of Manufacturing Technology Management	2016	Tactical	Manufacturing KPI	Indicator	Processes and assets	Generic/Undefined	0	0	Winroth, M., Almström, P., Andersson, C. (2016). Sustainable production indicators at factory level. Journal of Manufacturing Technology Management, 27(6), 842-873.
	International Journal of Physical Distribution and Logistics Management	2015	Tactical	Supply chain KPI	Review/Themes	Company	Generic/Undefined	20	10	Wong, C. Y., Wong, C. W., & Boon-itt, S. (2015). Integrating environmental management into supply chains: a systematic literature review and theoretical framework. International Journal of Physical Distribution & Logistics Management, 45(1/2), 43-68.
	International Journal of Interdisciplinary Social Sciences	2008	Strategic	Areas of Interventions	Review/Themes	Company	Generic/Undefined	3	0.333333	Wong, L., & Avery, G. C. (2008). Creating sustainability in organisations: beyond being green. International Journal of Interdisciplinary Social Sciences, 3(2), 68-74.
	Industrial Management and Data Systems	2016	Tactical	Supply chain KPI	Model/Function	Products	Commodities and consumer products	3	3	Wu, K. J., Liao, C. J., Tseng, M., & Chiu, K. K. S. (2016). Multi-attribute approach to sustainable supply chain management under uncertainty. Industrial Management & Data Systems, 116(4), 777-800.
	Journal of Cleaner Production	2017	Tactical	Supply chain KPI	Matrix	Company	Generic/Undefined	0	0	Xia, D., Yu, Q., Gao, Q., & Cheng, G. (2017). Sustainable technology selection decision-making model for enterprise in supply chain: Based on a modified strategic balanced scorecard. Journal of Cleaner Production, 141, 1337-1348.
	International Journal of Production Research	2013	Operational	Functions value/utility	Model/Function	Services and PSS	Automotive and machineries	21	5.25	Xing, K., Wang, H. F., & Qian, W. (2013). A sustainability-oriented multi-dimensional value assessment model for product-service development. International Journal of Production Research, 51(19), 5908-5933.
	Journal of Cleaner Production	2017	Strategic	Value creation areas	Framework/Roadmap	Services and PSS	Generic/Undefined	2	2	Yang, M., Evans, S., Vladimirova, D., & Rana, P. (2017). Value uncaptured perspective for sustainable business model innovation. Journal of Cleaner Production, 140, 1794-1804.
	Construction Innovation	2012	Tactical	Project KPI	Framework/Roadmap	Projects	Building and transportation	13	2.6	Yunus, R., & Yang, J. (2012). Critical sustainability factors in industrialised building systems. Construction Innovation, 12(4), 447-463.
	International Journal of Project Management	2014	Operational	Simulation/Optimization	Model/Function	Projects	Building and transportation	35	11.6667	Zhang, X., Wu, Y., Shen, L., & Skitmore, M. (2014). A prototype system dynamic model for assessing the sustainability of construction projects. International Journal of Project Management, 32(1), 66-76.
	Applied Soft Computing Journal	2016	Tactical	Supply chain KPI	Model/Function	Products	Generic/Undefined	0	0	Zhou, X., Pedrycz, W., Kuang, Y., & Zhang, Z. (2016). Type-2 fuzzy multi-objective DEA model: An application to sustainable supplier evaluation. Applied Soft Computing, 46, 424-440.
	193

## Sheet: Statistics full paper
	Distribution of publication per year
		2007	2008	2009	2010	2011	2012	2013	2014	2015	2016	2017 (jan)
	Operational	4	1	2	1	6	5	5	13	12	7	2	58
	Tactical	3	1	0	0	5	6	3	4	2	8	2	34
	Strategic	1	2	5	3	3	10	11	6	17	18	5	81
	Metalevel	0	1	1	1	4	3	1	2	2	3	2	20
		8	5	8	5	18	24	20	25	33	36	11	193
	Distribution of contributions per industrial sector and per year.
		2007	2008	2009	2010	2011	2012	2013	2014	2015	2016	2017
	Generic/Undefined	2	2	4	0	3	16	8	9	11	15	6	76
	Agriculture and mining	0	0	1	1	1	0	0	0	0	0	0	3
	Building and transportation	2	1	1	1	2	4	1	1	5	2	0	20
	Commodities/consumer products	3	1	1	1	6	3	2	7	9	7	3	43
	Automotive and machineries	1	1	0	2	6	1	9	7	7	12	2	48
	Advanced Engineering	0	0	1	0	0	0	0	1	1	0	0	3
		8	5	8	5	18	24	20	25	33	36	11	193
	Distribution of contributions per entity studied and per year.
		2007	2008	2009	2010	2011	2012	2013	2014	2015	2016	2017
	Company focus	1	1	3	2	3	11	6	6	8	10	3	54
	Project focus	2	1	2	1	0	2	0	1	2	2	0	13
	Process/asset focus	1	0	0	1	0	1	0	3	1	5	0	12
	Service/PSS focus	1	0	1	0	1	1	4	2	7	1	2	20
	Product focus	3	3	2	1	12	6	8	10	13	18	6	82
	Material focus	0	0	0	0	2	3	2	3	2	0	0	12
		8	5	8	5	18	24	20	25	33	36	11	193
		2007	2008	2009	2010	2011	2012	2013	2014	2015	2016	2017
	Review/Themes	0	1	2	1	2	7	7	5	3	3	0	31
	ISO Standard	1	0	0	0	0	1	1	0	0	0	0	3
	Survey/Experiment	0	1	1	1	4	5	2	5	4	6	4	33
	Framework/Roadmap	0	1	1	0	1	3	1	3	3	7	3	23
	Methodology	3	1	1	0	0	1	0	0	2	0	0	8
	Indicator	1	1	1	1	1	2	3	1	3	6	0	20
	Model/Function	2	0	1	2	9	3	5	10	15	14	3	64
	Matrix	1	0	1	0	1	2	1	1	3	0	1	11
													193
		2007	2008	2009	2010	2011	2012	2013	2014	2015	2016	2017
	Customer perception	0	1	0	1	3	2	0	1	2	2	1	13
	Sust. Framework	0	0	1	0	1	1	1	1	0	1	1	7
	Areas of Interventions	0	1	0	1	1	3	3	3	4	2	1	19
	BM selection	0	0	1	0	0	0	1	0	5	3	0	10
	Business transformation	0	0	1	0	1	3	4	1	2	4	1	17
	KPI measurement	0	0	1	0	0	2	1	1	2	5	0	12
	Sustainability score	0	0	1	2	1	1	1	0	2	3	0	11
	Value creation areas	1	1	1	0	0	1	1	1	2	1	3	12
	Manufacturing KPI	2	0	0	0	1	0	3	2	0	3	0	11
	Project KPI	1	1	0	0	1	1	0	0	0	0	0	4
	Supply chain challen.	0	0	0	0	1	2	0	0	0	0	0	3
	Supply chain KPI	0	0	0	0	2	3	0	2	2	5	2	16
	DM Drivers	2	0	0	0	1	2	4	0	1	0	0	10
	Functions value/utility	0	0	1	1	1	2	1	3	0	2	0	11
	Simulation/Optimization	0	0	0	0	1	0	0	5	5	1	0	12
	Qualitative models	2	1	1	0	2	1	0	5	5	1	2	20
	Visualization	0	0	0	0	1	0	0	0	1	0	0	2
													190
	20	0	1	3	7	0	Review/Themes	20	1	2	2	6	0
	2	0	0	1	0	0	ISO Standard	2	0	0	0	1	0
	10	0	0	17	6	0	Survey/Experiment	7	0	0	2	24	0
	17	0	2	3	1	0	Framework/Roadmap	11	1	0	3	8	0
	4	0	1	1	2	0	Methodology	1	1	0	2	4	0
	7	1	4	4	4	0	Indicator	9	1	1	3	3	3
	14	1	10	12	24	3	Model/Function	3	6	8	7	33	7
	2	1	2	2	4	0	Matrix	1	3	1	1	3	2
	Generic/Undefined	Agriculture and mining	Building and transportation	Commodities and consumer products	Automotive and machineries	Advanced Engineering		Company	Projects	Processes and assets	Services and PSS	Products	Materials

## Sheet: CITATION ANALYSIS-FULL TEXT 
	Total citations at Metalevel		Citations/year at Metalevel
	191	Ozaki and Sevastyanova (2011)	33	Broman, and Robèrt (2017)
	134	De Vries and Petersen (2009)	31.8333	Ozaki and Sevastyanova (2011)
	83	Hamzaoui Essoussi and Linton (2010)	16.75	De Vries and Petersen (2009)
	67	Michaud and Llerena (2011)	13	Bolis et al. (2014)
	55	Ha-Brookshire and Norum (2011)	11.8571	Hamzaoui Essoussi and Linton (2010)
	53	Lindsey (2011)	11.1667	Michaud and Llerena (2011)
	39	Bolis et al. (2014)	9.16667	Ha-Brookshire and Norum (2011)
	33	Broman, and Robèrt (2017)	8.83333	Lindsey (2011)
	23	Raska and Shaw (2012)	7	Biswas and Roy (2015)
	16	Tsai et al. (2012)	4.6	Raska and Shaw (2012)
	69.4		14.7207
	Total citations at Strategic level		Citations/year at Strategic level
	420	Boons and Lüdeke-Freund (2013)	108	Bocken et al. (2014)
	324	Bocken et al. (2014)	105	Boons and Lüdeke-Freund (2013)
	244	Schaltegger et al. (2012)	48.8	Schaltegger et al. (2012)
	233	Moore and Manring (2009)	38	Gimenez and Tachizawa (2012)
	214	Laszlo (2008)	32.8	Dahl (2012)
	190	Gimenez and Tachizawa (2012)	29.125	Moore and Manring (2009)
	164	Ueda et al. (2009)	25	Hansen and Schaltegger (2016)
	164	Dahl (2012)	23.7778	Laszlo (2008)
	84	Kuosmanen and Kuosmanen (2009)	20.5	Ueda et al. (2009)
	72	Tahir and Darton (2010)	19	Joyce and Paquin (2016)
	210.9		45.0003
	Total citations at Tactical level		Citations/year at Tactical level
	578	Carter and Easton (2011)	96.3333	Carter and Easton (2011)
	261	Ashby et al. (2012)	52.2	Ashby et al. (2012)
	102	Bai et al. (2012)	20.4	Bai et al. (2012)
	101	Abbasi and Nilsson (2012)	20.2	Abbasi and Nilsson (2012)
	64	Petros Sebhatu and Enquist (2007)	19	Faulkner and Badurdeen (2014)
	63	Aguado et al. (2013)	15.75	Aguado et al. (2013)
	57	Faulkner and Badurdeen (2014)	13.25	Le Bourhis et al. (2013)
	53	Le Bourhis et al. (2013)	11	Brown et al. (2014)
	52	Green et al. (2012)	10.4	Green et al. (2012)
	50	Abidin and Pasquire (2007)	10	Wong et al. (2015)
	138.1		26.8533
	Total citations at Operational level		Citations/year at Operational level
	314	Sakao and Shimomura (2007)	31.4	Sakao and Shimomura (2007)
	75	El Saadany et al. (2011)	21.3333	Varsei et al. (2014)
	64	Varsei et al. (2014)	15.5	Russell-Smith et al. (2015)
	60	Nelms et al. (2007)	12.5	El Saadany et al. (2011)
	52	Vinodh et al. (2011)	11.6667	Zhang et al. (2014)
	49	Kimita et al.(2009)	10	Coskun et al. (2016)
	41	Lombera and Rojo (2010)	8.66667	Vinodh et al. (2011)
	41	Alarcon et al. (2010)	8.5	Sproedt et al. (2015)
	37	Akadiri and Olomolaiye (2012)	7.4	Akadiri and Olomolaiye (2012)
	35	Zhang et al. (2014)	6.83333	Alarcon et al. (2010)
	76.8		13.38

## Sheet: SOURCE ANALYSIS-FULL TEXT 
	Statistics: Journal distribution (full text based)
	Journal Name	# papers	Metalevel	Strategic	Tactical	Operational				TOP 10 JOURNALS		Metalevel	Strategic	Tactical	Operational
	Journal of Cleaner Production	35	5	19	4	7				Journal of Cleaner Production (34)	34	5	19	4	7							Operational	Tactical	Strategic	Metalevel
	Journal of Manufacturing Technology Management	7	0	0	3	4				Journal of Manufacturing Technology Management (7)	7	0	0	3	4						Benchmarking	0	2	1	0
	Supply Chain Management	7	0	2	5	0				Supply Chain Management (7)	7	0	2	5	0						International Journal of Advanced Manufacturing Technology	1	1	1	0
	International Journal of Sustainable Engineering	6	2	1	1	2				International Journal of Sustainable Engineering (6)	6	2	1	1	2						Journal of Engineering, Design and Technology	3	0	0	0
	Clean Technologies and Environmental Policy	5	0	0	1	4				Clean Technologies and Environmental Policy (5)	5	0	0	1	4						Ecological indicators	1	1	2	0
	Business Strategy and the Environment	5	1	4	0	0				Business Strategy and the Environment (5)	5	1	4	0	0						Business Strategy and the Environment	0	0	4	1
	Ecological indicators	4	0	2	1	1				Ecological indicators (4)	4	0	2	1	1						Clean Technologies and Environmental Policy	4	1	0	0
	Journal of Engineering, Design and Technology	3	0	0	0	3				Journal of Engineering, Design and Technology (3)	3	0	0	0	3						International Journal of Sustainable Engineering	2	1	1	2
	International Journal of Advanced Manufacturing Technology	3	0	1	1	1				International Journal of Advanced Manufacturing Technology (3)	3	0	1	1	1						Supply Chain Management	0	5	2	0
	Benchmarking	3	0	1	2	0				Benchmarking (3)	3	0	1	2	0						Journal of Manufacturing Technology Management	4	3	0	0
	Construction and Building Materials	2	0	0	0	2				Other journal	116	12	51	16	36						Journal of Cleaner Production	7	4	19	5
	International Journal of Agile Systems and Management	2	0	0	0	2
	International Journal of Computer Integrated Manufacturing	2	0	0	0	2
	Construction Innovation	2	0	0	1	1
	International Journal of Project Management	2	0	0	1	1
	Management of Environmental Quality	2	0	0	1	1
	International Journal of Innovation and Sustainable Development	2	0	1	0	1
	International Journal of Production Research	2	0	1	0	1
	Management Research Review	2	1	0	1	0
	Industrial Management and Data Systems	2	0	0	2	0
	International Journal of Physical Distribution and Logistics Management	2	0	0	2	0
	CIRP Annals - Manufacturing Technology	2	0	1	1	0
	Proceedings of the Institution of Civil Engineers: Engineering Sustainability	2	1	0	1	0
	International Journal of Operations and Production Management	2	0	2	0	0
	Advances in Appreciative Inquiry	2	0	2	0	0
	International Journal of Production Economics	2	0	2	0	0
	Journal of Strategic Marketing	2	0	2	0	0
	Measuring Business Excellence	2	0	2	0	0
	Organization and Environment	2	0	2	0	0
	Ecological Economics	2	1	1	0	0
	Energy Policy	2	2	0	0	0
	Building and Environment	1	0	0	0	1
	Building Research and Information	1	0	0	0	1
	CIRP Journal of Manufacturing Science and Technology	1	0	0	0	1
	Decision Support Systems	1	0	0	0	1
	Engineering, Construction and Architectural Management	1	0	0	0	1
	Expert Systems with Applications	1	0	0	0	1
	Handbook of Ethics, Values, and Technological Design: Sources, Theory, Values and Application Domains	1	0	0	0	1
	HandBook of Manufacturing Engineering and Technology	1	0	0	0	1
	International Journal for Quality Research	1	0	0	0	1
	International Journal of Automation Technology	1	0	0	0	1
	International Journal of Engineering Education	1	0	0	0	1
	International Journal of Product Lifecycle Management	1	0	0	0	1
	International Journal of Supply Chain Management	1	0	0	0	1
	International Journal of Sustainable Development and World Economy	1	0	0	0	1
	International Journal of Sustainable Manufacturing	1	0	0	0	1
	Journal of Construction Engineering and Management	1	0	0	0	1
	Journal of Engineering and Technology Management	1	0	0	0	1
	Journal of Industrial Ecology	1	0	0	0	1
	Journal of Industrial Engineering and Management	1	0	0	0	1
	Journal of Modelling in Management	1	0	0	0	1
	Materials and Design	1	0	0	0	1
	Research in Engineering Design	1	0	0	0	1
	Structural Survey	1	0	0	0	1
	Sustainability	1	0	0	0	1
	Treatise on Sustainability Science and Engineering	1	0	0	0	1
	Civil Engineering and Environmental Systems	1	0	0	0	1
	Applied Soft Computing Journal	1	0	0	0	1
	Archives of Materials Science and Engineering	1	0	0	1	0
	Industrial Engineer	1	0	0	1	0
	Journal on Chain and Network Science	1	0	0	1	0
	TQM Magazine	1	0	0	1	0
	Handbook of Research on Global Supply Chain Management	1	0	1	0	0
	International Journal of Information Technology and Decision Making	1	0	1	0	0
	Accounting Research Journal	1	0	1	0	0
	Business Horizons	1	0	1	0	0
	Business Ethics	1	0	1	0	0
	Business Process Management Journal	1	0	1	0	0
	California Management Review	1	0	1	0	0
	Corporate Governance	1	1	0	0	0
	EuroChoices	1	0	1	0	0
	EuroMed Journal of Business	1	0	1	0	0
	European Business Review	1	0	1	0	0
	European Journal of Innovation Management	1	0	1	0	0
	European Journal of Operational Research	1	0	1	0	0
	Foresight	1	0	1	0	0
	Handbook of Research on Sustainable Development and Economics	1	0	1	0	0
	Industrial Marketing Management	1	0	1	0	0
	International Journal of Engineering Research in Africa	1	0	1	0	0
	International Journal of Industrial Engineering : Theory Applications and Practice	1	0	1	0	0
	International Journal of Innovation Science	1	0	1	0	0
	International Journal of Interdisciplinary Social Sciences	1	0	1	0	0
	Journal of Accounting and Organizational Change	1	0	1	0	0
	Journal of Business and Industrial Marketing	1	0	1	0	0
	Journal of Environmental Management	1	0	0	0	1
	Journal of Industrial and Production Engineering	1	0	1	0	0
	Journal of Product Innovation Management	1	0	1	0	0
	Kybernetes	1	0	1	0	0
	Manufacturing and Service Operations Management	1	0	1	0	0
	Problemy Ekorozwoju	1	0	1	0	0
	Research Technology Management	1	0	1	0	0
	Service Business	1	0	1	0	0
	Service Science Research, Strategy and Innovation: Dynamic Knowledge Management Methods	1	0	1	0	0
	SpringerBriefs in Applied Sciences and Technology	1	0	1	0	0
	Sustainability: Multi-Disciplinary Perspectives	1	0	1	0	0
	Technological, Managerial and Organizational Core Competencies: Dynamic Innovation and Sustainable Development	1	0	1	0	0
	TQM Journal	1	0	1	0	0
	Journal of Business Ethics	1	0	1	0	0
	Environmental and Resource Economics	1	1	0	0	0
	Environmental Monitoring and Assessment	1	1	0	0	0
	International Journal of Environmental Technology and Management	1	1	0	0	0
	Journal of Consumer Marketing	1	1	0	0	0
	Journal of Mechanical Design, Transactions of the ASME	1	1	0	0	0
	Review of Marketing Research	1	0	0	0	1
	TOTAL PAPERS	193	19	80	32	62
	TOTAL JOURNALS	103	14	50	21	42
